# Supplementary material for: Evidence for complexation-induced micro-extension of poly(vinyl alcohol) chains in interphase and amorphous domains from solid-state NMR
Source: Royal Society of Chemistry journal article supplement (doi:10.1039/d2sm01136k), 2022-01-01
Supplement: d2sm01136k1.pdf [file d2sm01136k1.pdf]

## Supporting Information

### **Evidence for Complexation-Induced Micro-Extension of Poly(Vinyl Alcohol) Chains in Interphase and Amorphous Domains from Solid-State NMR**

Yahui Li, Wei Tao and Wei Chen\*

*National Synchrotron Radiation Laboratory, Anhui Provincial Engineering Laboratory of Advanced Functional Polymer Film, CAS Key Laboratory of Soft Matter Chemistry, University of Science and Technology of China, Hefei 230026, China.*

---

\* Correspondence author: [wc003@ustc.edu.cn](mailto:wc003@ustc.edu.cn)

## 1. Multi-peak fitting of different iodinated PVA samples.

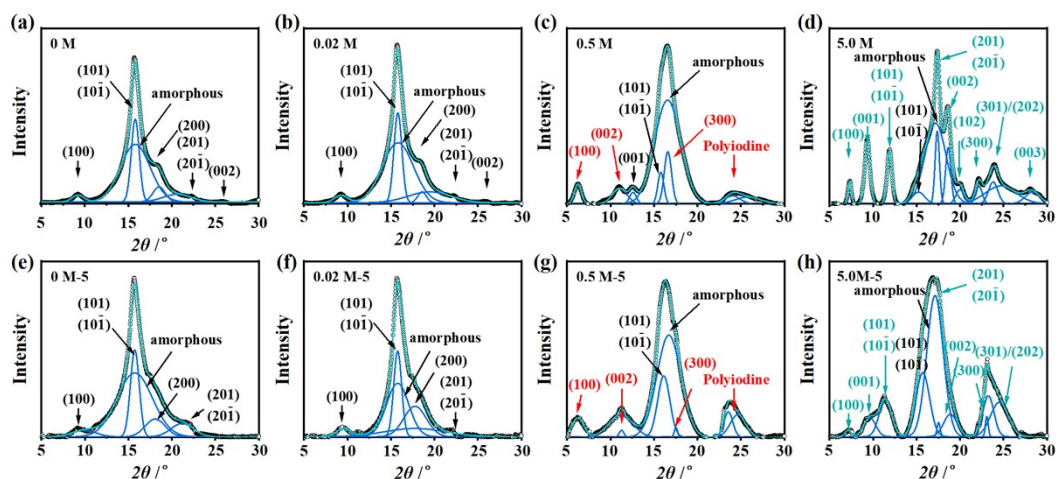

**Fig. S1.** Multi-peak fitting of One-dimensional integrated WAXS curves of the unoriented [(a)-(d)] and oriented [(e)-(h)] PVA films of 0 M, 0.02 M, 0.5 M and 5 M iodine concentrations. The crystal index of different crystals is labeled in various colors: black, red, and green for PVA crystal, PVA-I<sub>3</sub><sup>-</sup> complex I, and PVA-I<sub>3</sub><sup>-</sup> complex II, respectively.

## 2. Integrated results of CP/MAS spectra.

Table S1. Integrated chemical shift, full width at half-maximum (FWHM) of lines C(H)(I/II/III) for the CP/MAS spectra of the unoriented and oriented samples.

| Sample     |        | Chemical shift/ ppm |      |      | FWHM/ Hz |     |     |
|------------|--------|---------------------|------|------|----------|-----|-----|
|            |        | C(H)                |      |      | C(H)     |     |     |
|            |        | I                   | II   | III  | I        | II  | III |
| Unoriented | 0 M    | 75.8                | 70.1 | 64.4 | 446      | 445 | 402 |
|            | 0.02 M | 75.8                | 70.1 | 64.3 | 454      | 444 | 402 |
|            | 0.5 M  | 75.3                | 70.0 | 64.4 | 396      | 423 | 397 |
|            | 5 M    | 75.3                | 70.4 | 65.0 | 422      | 377 | 398 |
| Oriented   | 0 M    | 75.7                | 70.1 | 64.3 | 434      | 426 | 406 |
|            | 0.02 M | 75.7                | 70.1 | 64.3 | 475      | 429 | 412 |
|            | 0.5 M  | 75.3                | 70.4 | 64.4 | 760      | 459 | 530 |
|            | 5 M    | 73.3                | 70.4 | 65.1 | 1083     | 349 | 504 |

3.  $^{13}\text{C}$   $T_1$  relaxation curves of unoriented samples (0.5 M and 5 M).

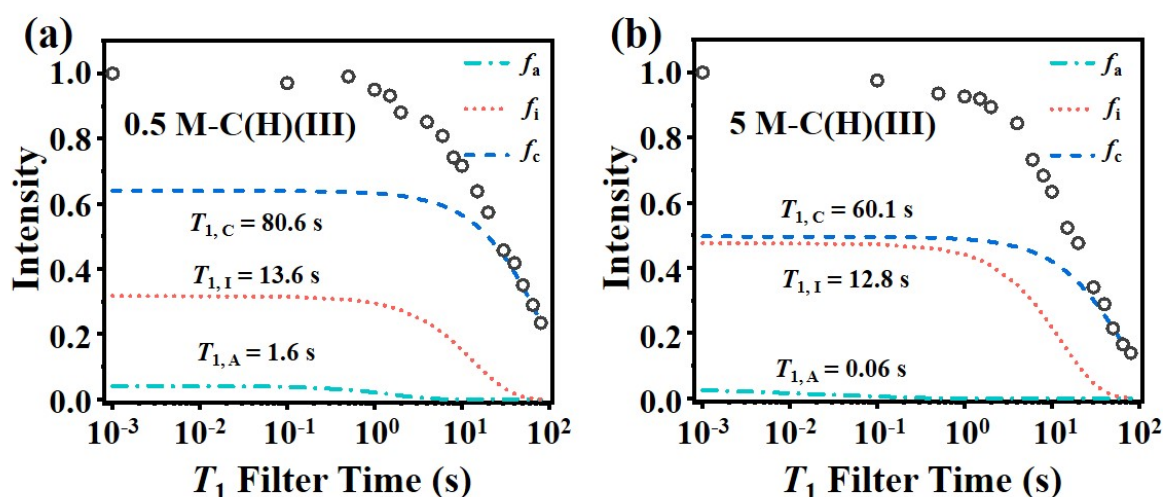

Fig. S2. Torchia  $^{13}\text{C}$   $T_1$  relaxation curves of unoriented iodinated PVA films at (a) 0.5 M and (b) 5 M.

4.  $^{13}\text{C}$  DP/MAS spectra of pure PVA film with different recycle delay times and NS.

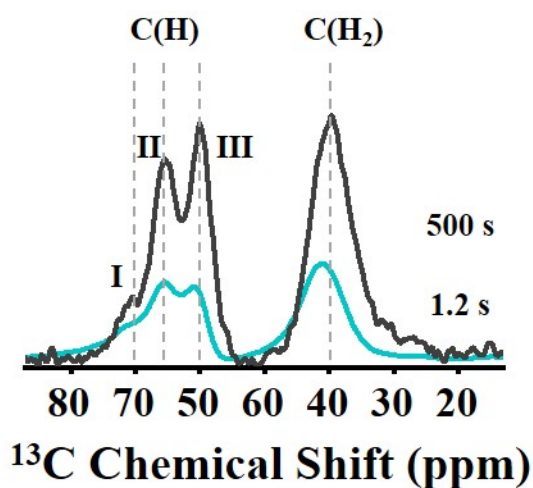

Fig. S3.  $^{13}\text{C}$  DP/MAS spectra of pure PVA film (0 M) with different recycle delay times and NS: Black-500 s (128 scans) for sufficient fully signals, Green-1.2 s (30720 scans) for the amorphous signal. The signal of 500 s is scaled by 240 to compensate for the different NS<sup>1,2</sup>.

### 5. Integrated results of the three-phase spectra.

Table S2. Integrated chemical shift, full width at half-maximum (FWHM) of lines C(H)(I/II/III) for the three-phase spectra of the unoriented and oriented samples.

| Sample     |          | Phase | Chemical shift/ ppm |      |      | FWHM/ Hz |     |     |     |
|------------|----------|-------|---------------------|------|------|----------|-----|-----|-----|
|            |          |       | C(H)                |      |      | C(H)     |     |     |     |
|            |          |       | I                   | II   | III  | I        | II  | III |     |
| Unoriented | 0 M      | C     | 76.3                | 70.4 | 64.3 | 609      | 441 | 418 |     |
|            |          | I     | 75.8                | 69.9 | 64.6 | 421      | 461 | 390 |     |
|            |          | A     | 73.7                | 69.8 | 65.1 | 946      | 426 | 390 |     |
|            | 0.02 M   | C     | 76.4                | 70.3 | 64.1 | 433      | 459 | 420 |     |
|            |          | I     | 75.5                | 69.9 | 64.5 | 395      | 462 | 416 |     |
|            |          | A     | 74.1                | 69.6 | 64.9 | 969      | 449 | 390 |     |
|            | 0.5 M    | C     | 75.7                | 70.2 | 64.3 | 359      | 418 | 377 |     |
|            |          | I     | 74.9                | 69.8 | 64.5 | 406      | 410 | 418 |     |
|            |          | A     | 73.7                | 69.8 | 65.1 | 924      | 390 | 389 |     |
|            | 5 M      | C     | 75.6                | 70.5 | 64.6 | 405      | 437 | 431 |     |
|            |          | I     | 75.1                | 70.4 | 65.2 | 455      | 368 | 428 |     |
|            |          | A     | 74.8                | 70.4 | 65.6 | 618      | 368 | 391 |     |
|            | Oriented | 0 M-5 | C                   | 76.2 | 70.3 | 64.1     | 483 | 420 | 430 |
|            |          |       | I                   | 75.4 | 69.9 | 64.7     | 462 | 435 | 399 |
|            |          |       | A                   | 74.9 | 69.8 | 65.0     | 734 | 426 | 391 |
| 0.02 M-5   |          | C     | 76.1                | 70.4 | 64.0 | 526      | 428 | 457 |     |
|            |          | I     | 75.5                | 69.9 | 64.4 | 419      | 442 | 401 |     |
|            |          | A     | 74.1                | 69.8 | 64.9 | 942      | 409 | 417 |     |
| 0.5 M-5    |          | C     | -                   | -    | -    | -        | -   | -   |     |
|            |          | I     | -                   | -    | -    | -        | -   | -   |     |
|            |          | A     | 74.2                | 70.0 | 64.8 | 1224     | 507 | 466 |     |
| 5 M-5      |          | C     | -                   | -    | -    | -        | -   | -   |     |
|            |          | I     | -                   | -    | -    | -        | -   | -   |     |
|            |          | A     | 73.6                | 70.6 | 65.4 | 1251     | 408 | 473 |     |

## 6. SUPER results of the pure PVA film.

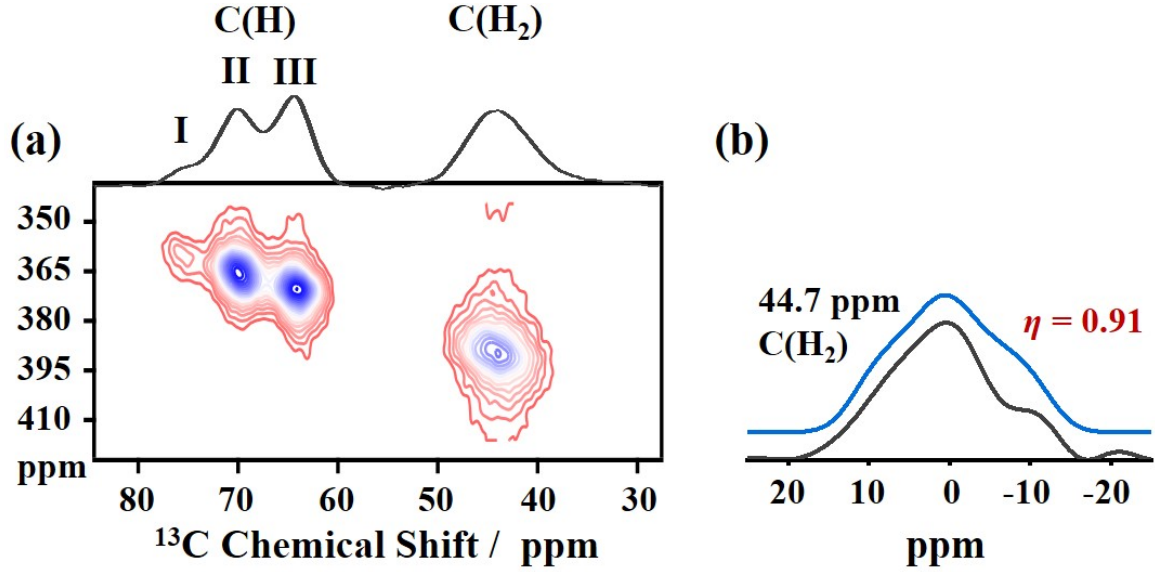

**Fig. S4.** (a) Unsheared 2D SUPER spectra of 0 M obtained at a MAS rate of 5 kHz. (b) Corresponding powder pattern extracted at the labeled ppm value (black line), it is obtained by shifting the isotropic chemical shift to  $\delta = 0$  ppm. The simulated CSA curve (blue line) was carried out by the NMR WEPLAB online software.<sup>3</sup> The line shape analysis of the chemical shift principal value ( $\delta_{11}$ ,  $\delta_{22}$ , and  $\delta_{33}$ ) and an asymmetry parameter  $\eta$  can be obtained.  $\eta = (\delta_{22} - \delta_{33})/(\delta_{11} - \delta_{iso})$ , where  $\delta_{iso} = (\delta_{11} + \delta_{22} + \delta_{33})/3$  and assuming that  $|\delta_{11} - \delta_{iso}| \geq |\delta_{22} - \delta_{iso}| \geq |\delta_{33} - \delta_{iso}|$ ,  $0 \leq \eta \leq 1$ .<sup>4</sup>

## 7. Simulation of the static $^{13}\text{C}$ CP spectra of $\text{C}(\text{H}_2)$

In this work, simulation of the static  $^{13}\text{C}$  CP spectra of  $\text{C}(\text{H}_2)$  was carried out by the NMR simulation software “SIMPSON”. The crystal file used in “SIMPSON” was generated using the step method to simulate the line shape of the powder pattern. For the simulation of the oriented sample, based on the step method, MATLAB software was used to generate  $(\alpha, \beta)$  pairs with  $\alpha$  span over  $[0, 360]$  degrees and  $\beta$  covered an adjustable range as  $[\alpha, \beta]$  between  $[0, 180]$  degree. Finally, the weighting factor  $w$  was normalized to  $[0, 1]$ . The step method was defined as follows:<sup>5</sup>

$$0 \leq \alpha < 2\pi, 0 \leq \beta < \frac{\pi}{2} \quad (1)$$

$$\alpha_i = \frac{2\pi i}{N_\alpha}, 0 \leq i \leq N_\alpha - 1 \quad (2)$$

$$\beta_j = \frac{\pi}{4N_\beta}(2j + 1), 0 \leq j \leq N_\beta - 1 \quad (3)$$

$$w_j = \sin\beta_j \quad (4)$$

$$\text{normalized } w_j = \frac{\sin\beta_j}{\sum_j \sin\beta_j} \quad (5)$$

$\alpha$  and  $\beta$  were azimuth and polar angle of magnetic field  $B_0$  in the chemical shift principle axis system, respectively.  $N_\alpha$  and  $N_\beta$  divided the range of integration for the  $\alpha$  and  $\beta$  angles into evenly spaced segments, respectively, giving a total number of orientations  $N_\alpha * N_\beta$ .

This gives a hemisphere distribution set  $S_{\text{hemi}} = \{\alpha_i, \beta_j, w_j\}$ , where the weights depend only on the  $\beta$  angle. For the simulation of the crystalline domain ( $0^\circ$ ),  $\beta$  of  $1^\circ \pm 1^\circ$  was used in the simulation.  $\beta$  of  $1^\circ \pm 1^\circ$  and  $\beta$  of  $35^\circ \sim 50^\circ$  were combined in the simulation of the interphase domain ( $0^\circ$ ) where  $35^\circ \sim 50^\circ$  was determined

---

by the chemical shift position relative to 1°.

8. Torchia  $^{13}\text{C}$   $T_1$  relaxation curves of oriented iodinated PVA films.

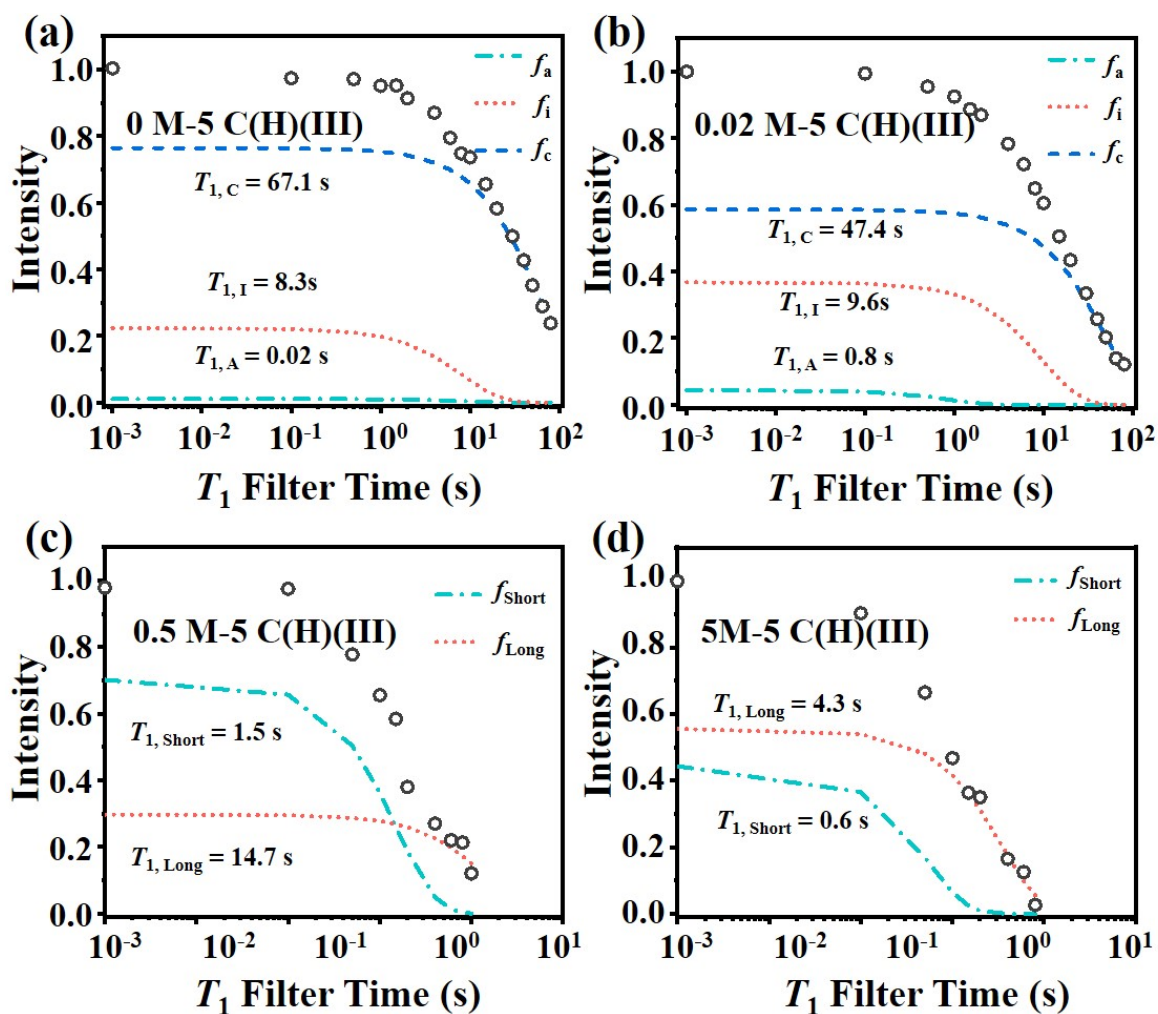

Fig. S5. Torchia  $^{13}\text{C}$   $T_1$  relaxation curves of oriented iodinated PVA films at (a) 0 M, (b) 0.02 M, (c) 0.5 M and (d) 5 M.

9. Deconvoluted  $^{13}\text{C}$  CP/MAS spectra of oriented iodinated PVA films.

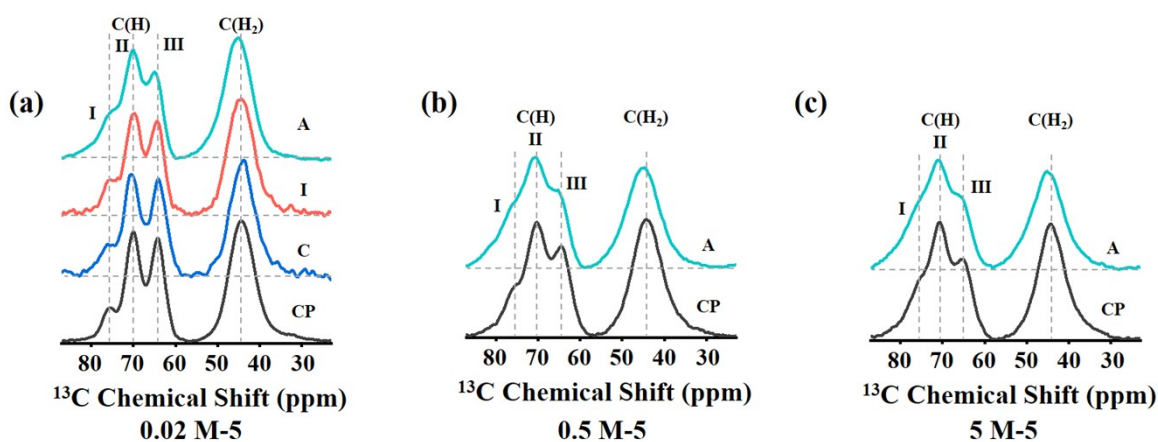

Fig. S6. Deconvoluted  $^{13}\text{C}$  CP/MAS spectra of oriented iodinated PVA films at (a) 0.02 M, (b) 0.5 M and (c) 5 M.

---

## References

- 1 D. M. Mowery, D. J. Harris and K. Schmidt-Rohr, *Macromolecules*, 2006, **39**, 2856–2865.
- 2 W. G. Hu and K. Schmidt-Rohr, *Polymer (Guildf.)*, 2000, **41**, 2979–2987.
- 3 V. Macho, L. Brombacher and H. W. Spiess, *Appl. Magn. Reson.*, 2001, **20**, 405–432.
- 4 Y. Wei, D. K. Le and A. Ramamoorthy, *J. Am. Chem. Soc.*, 2001, **123**, 6118–6126.
- 5 M. Eden and M. H. Levitt, *J. Magn. Res.*, 1998, **132**, 220–239.
